# Supplementary material for: Effective treatment of SARS-CoV-2-infected rhesus macaques by attenuating inflammation
Source: PubMed Central journal article supplement (PMC7525229; doi:10.1038/s41422-020-00414-4), 2020-09-30
Supplement: 41422_2020_414_MOESM1_ESM.pdf [file 41422_2020_414_MOESM1_ESM.pdf]

**Supplementary information, Table S1. Viral RNA in nose, throat and anal swabs by RT-qPCR at different time points after infection.**

| Animal | Nose swabs |        |        | Throat swabs |        |        | Anus swabs |        |        |
|--------|------------|--------|--------|--------------|--------|--------|------------|--------|--------|
|        | 18 dpi     | 21 dpi | 34 dpi | 18 dpi       | 21 dpi | 34 dpi | 18 dpi     | 21 dpi | 34 dpi |
| RM1    | 0.00       | 0.00   | 0.00   | 0.00         | 0.00   | 0.00   | 0.00       | 0.00   | 0.00   |
| RM2    | 0.00       | 0.00   | 0.00   | 0.00         | 0.00   | 0.00   | 0.00       | 0.00   | 0.00   |
| RM3    | 4.68       | 4.57   | 0.00   | 0.00         | 0.00   | 2.83*  | 0.00       | 0.00   | 0.00   |
| RM4    | 0.00       | 0.00   | 0.00   | 0.00         | 0.00   | 0.00   | 0.00       | 0.00   | 0.00   |
| RM5    | 0.00       | 0.00   | 0.00   | 0.00         | 0.00   | 0.00   | 0.00       | 0.00   | 0.00   |
| RM6    | 0.00       | 0.00   | 0.00   | 0.00         | 0.00   | 0.00   | 0.00       | 0.00   | 0.00   |
| RM7    | 0.00       | 2.94*  | 0.00   | 0.00         | 0.00   | 0.00   | 0.00       | 0.00   | 0.00   |
| RM8    | 0.00       | 0.00   | 0.00   | 0.00         | 0.00   | 0.00   | 0.00       | 0.00   | 0.00   |
| RM9    | 2.65*      | 3.14   | 0.00   | 2.65*        | 3.14   | 0.00   | 4.33       | 6.17   | 0.00   |

Viral load (log<sub>10</sub> copies/ml), \* means below the limit of detection.

**Supplementary information, Table S2. Clinical and pathological observations in rhesus macaques infected with SARS-CoV-2 and treated with SSK1 or vehicle.**

| <b>Treatment</b>                                    | <b>Vehicle-DMSO</b>                |                           |                                    | <b>SSK1-0.5 mg/kg</b>     |                        |                           | <b>SSK1-2.0 mg/kg</b>       |                           |                                |
|-----------------------------------------------------|------------------------------------|---------------------------|------------------------------------|---------------------------|------------------------|---------------------------|-----------------------------|---------------------------|--------------------------------|
| <b>Animal</b>                                       | RM1                                | RM2                       | RM3                                | RM4                       | RM5                    | RM6                       | RM7                         | RM8                       | RM9                            |
| <b>Age</b>                                          | Young<br>1-year                    | Adult<br>5-year           | Old<br>15-year                     | Young<br>1-year           | Adult<br>5-year        | Old<br>17-year            | Young<br>1-year             | Adult<br>5-year           | Old<br>18-year                 |
| <b>Body weight change%<br/>(32 dpi vs 22 dpi)</b>   | + 22.22                            | - 17.24                   | - 17.72                            | + 25.00                   | - 3.45                 | - 1.25                    | + 12.50                     | + 9.68                    | + 1.82                         |
| <b>Necropsy</b>                                     | Obvious bright red lesions in lung | No visible lesion in lung | Obvious bright red lesions in lung | No visible lesion in lung | Slight lesions in lung | No visible lesion in lung | A very small lesion in lung | No visible lesion in lung | A dark obsolete lesion in lung |
| <b>Pathological evaluation by H&amp;E staining*</b> |                                    |                           |                                    |                           |                        |                           |                             |                           |                                |
| Inflammatory cell infiltration                      | ++                                 | ++                        | ++                                 | ++                        | +                      | +                         | +                           | +                         | +                              |
| Hemorrhage                                          | ++                                 | +                         | ++                                 | +                         | -                      | -                         | -                           | -                         | +                              |
| Thickened alveolar septum                           | ++                                 | +++                       | ++                                 | +                         | +                      | +                         | +                           | +                         | +                              |
| Edema                                               | ++                                 | ++                        | ++                                 | +                         | +                      | +                         | +                           | +                         | +                              |

\*Histology assessment criteria: We divided the characteristics of histologic lung lesions into four items, including inflammatory cell infiltration (including lymphocytes, neutrophils and monocyte-macrophages), hemorrhage, thickened alveolar septum and edema. Stained HE slides of lung lobes were analyzed and scored by pathologists based on the severity of each item (from - to ++++).

Supplementary information, Table S3. Evaluate the effects of SSK1 on liver and kidney function of rhesus macaques infected with SARS-CoV-2.

|                  | Treatment         | Animal | Before treatment | After treatment |        |        |        |        |        |        |
|------------------|-------------------|--------|------------------|-----------------|--------|--------|--------|--------|--------|--------|
|                  |                   |        | 21 dpi           | 23 dpi          | 24 dpi | 25 dpi | 26 dpi | 27 dpi | 28 dpi | 30 dpi |
| <b>AST (U/L)</b> | Vehicle           | RM1    | 52               | 52              | 30     | 33     | 36     | 43     | 53     | 39     |
|                  |                   | RM2    | 29               | 30              | 25     | 32     | 35     | 34     | 29     | 30     |
|                  |                   | RM3    | 31               | 29              | 32     | 35     | 34     | 42     | 27     | 25     |
|                  | SSK1<br>0.5 mg/kg | RM4    | 91               | 69              | 50     | 39     | 40     | 37     | 22     | 38     |
|                  |                   | RM5    | 24               | 19              | 20     | 18     | 18     | 23     | 17     | 18     |
|                  |                   | RM6    | 74               | 44              | 35     | 40     | 31     | 46     | 28     | 28     |
|                  | SSK1<br>2.0 mg/kg | RM7    | 61               | 56              | 38     | 32     | 59     | 56     | 44     | 46     |
|                  |                   | RM8    | 33               | 19              | 30     | 22     | n.d.   | 28     | 24     | 26     |
|                  |                   | RM9    | 28               | 27              | 32     | 27     | 28     | 35     | 28     | 30     |
| <b>ALT (U/L)</b> | Vehicle           | RM1    | 21               | 39              | 29     | 25     | 26     | 29     | 28     | 26     |
|                  |                   | RM2    | 20               | 21              | 20     | 23     | 28     | 24     | 21     | 26     |
|                  |                   | RM3    | 13               | 16              | 14     | 17     | 19     | 21     | 17     | 18     |
|                  | SSK1<br>0.5 mg/kg | RM4    | 26               | 44              | 46     | 39     | 31     | 33     | 19     | 28     |
|                  |                   | RM5    | 32               | 31              | 31     | 27     | 30     | 35     | 33     | 36     |
|                  |                   | RM6    | 74               | 65              | 50     | 46     | 39     | 47     | 34     | 41     |
|                  | SSK1<br>2.0 mg/kg | RM7    | 32               | 37              | 39     | 29     | 37     | 35     | 34     | 32     |
|                  |                   | RM8    | 76               | 46              | 50     | 36     | n.d.   | 35     | 34     | 33     |
|                  |                   | RM9    | 28               | 26              | 37     | 29     | 27     | 27     | 26     | 41     |

|                                       |                   |     |      |      |      |      |      |      |      |      |
|---------------------------------------|-------------------|-----|------|------|------|------|------|------|------|------|
| <b>UA</b><br>( $\mu\text{mol/L}$ )    | Vehicle           | RM1 | 2    | 3    | 3    | 4    | 4    | 5    | 3    | 3    |
|                                       |                   | RM2 | 5    | 2    | 7    | 2    | 3    | 3    | 2    | 3    |
|                                       |                   | RM3 | 3    | 2    | 7    | 2    | 5    | 2    | 3    | 2    |
|                                       | SSK1<br>0.5 mg/kg | RM4 | 8    | 4    | 4    | 4    | 1    | 6    | 3    | 6    |
|                                       |                   | RM5 | 5    | 4    | 7    | 3    | 5    | 3    | 2    | 2    |
|                                       |                   | RM6 | 9    | 1    | 2    | 3    | 1    | 4    | 1    | 4    |
|                                       | SSK1<br>2.0 mg/kg | RM7 | 5    | 2    | 4    | 6    | 5    | 8    | 6    | 3    |
|                                       |                   | RM8 | 13   | 4    | 3    | 2    | n.d. | 5    | 3    | 6    |
|                                       |                   | RM9 | 10   | 0    | 2    | 5    | 6    | 3    | 1    | 5    |
| <b>CRE-E</b><br>( $\mu\text{mol/L}$ ) | Vehicle           | RM1 | 30   | 31   | 29   | 30   | 32   | 32   | 34   | 31   |
|                                       |                   | RM2 | 70   | 56   | 52   | 58   | 64   | 61   | 74   | 72   |
|                                       |                   | RM3 | 69   | 61   | 57   | 61   | 65   | 66   | 81   | 73   |
|                                       | SSK1<br>0.5 mg/kg | RM4 | 28   | 34   | 30   | 30   | 25   | 27   | 32   | 30   |
|                                       |                   | RM5 | 55   | 41   | 38   | 31   | 40   | 38   | 48   | 41   |
|                                       |                   | RM6 | 49   | 37   | 38   | 40   | 41   | 46   | 51   | 50   |
|                                       | SSK1<br>2.0 mg/kg | RM7 | 33   | 30   | 32   | 30   | 31   | 29   | 35   | 34   |
|                                       |                   | RM8 | 55   | 45   | 50   | 42   | n.d. | 48   | 57   | 55   |
|                                       |                   | RM9 | 58   | 46   | 57   | 50   | 52   | 54   | 63   | 50   |
| <b>ALP</b><br>(U/L)                   | Vehicle           | RM1 | 1398 | 1522 | 1229 | 1281 | 1360 | 1312 | 1283 | 1395 |
|                                       |                   | RM2 | 152  | 128  | 116  | 141  | 171  | 154  | 124  | 173  |
|                                       |                   | RM3 | 102  | 96   | 83   | 92   | 94   | 108  | 82   | 107  |
|                                       | SSK1<br>0.5 mg/kg | RM4 | 822  | 857  | 778  | 789  | 595  | 663  | 432  | 728  |
|                                       |                   | RM5 | 124  | 94   | 86   | 66   | 74   | 75   | 67   | 89   |
|                                       |                   | RM6 | 100  | 101  | 101  | 107  | 97   | 112  | 85   | 111  |

|  |                   |     |     |     |     |     |      |     |     |     |
|--|-------------------|-----|-----|-----|-----|-----|------|-----|-----|-----|
|  | SSK1<br>2.0 mg/kg | RM7 | 685 | 101 | 101 | 107 | 97   | 112 | 85  | 111 |
|  |                   | RM8 | 427 | 280 | 365 | 269 | n.d. | 321 | 292 | 397 |
|  |                   | RM9 | 233 | 192 | 250 | 203 | 212  | 226 | 188 | 192 |

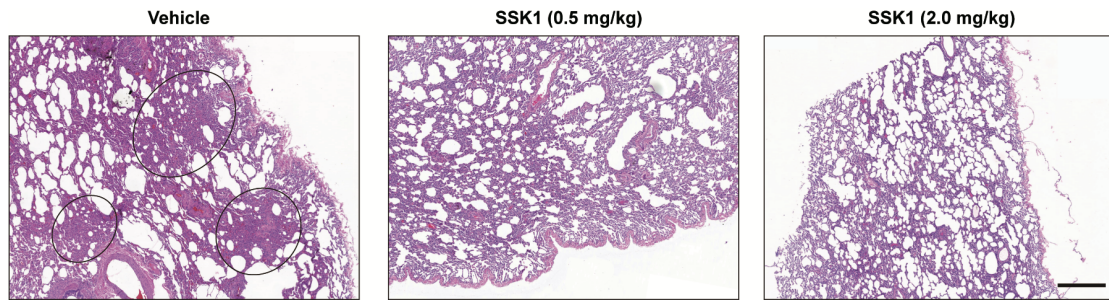

**Supplementary information, Figure S1.** Representative low magnification images of H&E staining shows that SSK1 treatment improved the pneumonia of monkeys infected with SARS-CoV-2. Circles show the area of interstitial pneumonia. Scale bar, 500  $\mu\text{m}$ .

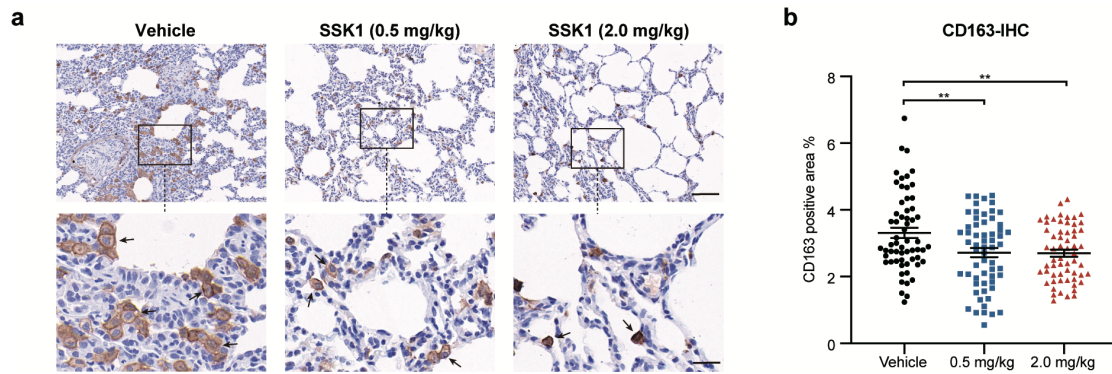

**Supplementary information, Figure S2. a** Immunohistochemistry (IHC) analysis for CD163 in lung tissues collected from SARS-CoV-2-infected monkeys treated with vehicle, 0.5 mg/kg or 2.0 mg/kg SSK1. Top, low magnification images; bottom, high magnification images of the boxed area in the top line. Scale bars, top: 100  $\mu$ m; bottom: 25  $\mu$ m. **b** Quantification of the immunohistochemistry staining of CD163-positive cells in lung tissues after treatment. Analyzed in 20 random fields (0.75 mm<sup>2</sup> per field) per animal, 3 animals per group. Each data point represents an independent field of view in the IHC slides. Data was analyzed with one-way ANOVA, all error bars represent SEM, \*\* $P < 0.01$ .

## **Materials and Methods**

### **Ethics and biosafety statement**

All animal experiments were performed in the animal biosafety level 4 (ABSL-4) facility of National Kunming High-level Biosafety Primate Research Center, Yunnan, China. All animal procedures were approved by the Institutional Animal Care and Use Committee of Institute of Medical Biology, Chinese Academy of Medical Science (Ethics number: DWSP202002 001). Rhesus macaques were monitored at least twice daily throughout the experiment. Commercial monkey chow, treats and fruit were provided daily by trained personnel.

### **Study design**

To evaluate the therapeutic effect of SSK1 on the recovery period of SARS-CoV-2 infection, we used nine rhesus macaques of three different ages as reported before. All the animals were inoculated with total 4.75 ml of  $10^6$  pfu/ml SARS-CoV-2 intratracheally (4.00 ml), intranasally (0.50 ml) and on conjunctiva (0.25 ml). The nine rhesus macaques were divided into three groups according to the treatments, which included vehicle (DMSO), low dosage (0.5 mg/kg) and high dosage (2.0 mg/kg) of SSK1, respectively. Each group randomly selected one young, one adult and one old monkey. The final grouping is presented as following: the vehicle-treated group, RM1 (young), RM2 (adult) and RM3 (old); 0.5 mg/kg SSK1-treated group, RM4 (young), RM5 (adult) and RM6 (old); 2.0 mg/kg SSK1-treated group, RM7 (young), RM8 (adult) and RM9 (old).

As the experimental schedule showed in Figure 1a, we started the treatment on 22 dpi, and at this time the virus was almost undetectable. For each group, vehicle (DMSO), low dosage SSK1 (0.5 mg/kg) and high dosage SSK1 (2.0 mg/kg) were administrated intravenously (i.v.) once a day from 22 to 28 dpi. Animals were anesthetized and clinical exams were performed. We recorded the body weight, anal temperature on



each examination day and collected blood samples for hematology analysis as well as swabs from nasal, throat and rectal for virus quantitative detection. The monkeys were euthanized on 34, 35 and 36 dpi and recorded the pathological changes of lungs. Lung tissue samples were collected for further analyzed.

### **Drug treatment**

100 mg/ml SSK1 dissolved in DMSO (Life Science, Cat# 1087C114) was mixed in 95% PBS (Gibco, Cat# 21-040-CVC), 5% Tween-80 (BioFroxx, Cat# 1716) and administrated intravenously (i.v.) at the dosage of 0.5 mg/kg or 2.0 mg/kg to monkeys at the indicated time point (the injection finished within 5-10 minutes). DMSO mixed in 95% PBS (Gibco, Cat# 21-040-CVC), 5% Tween-80 (BioFroxx, Cat# 1716) was intravenously (i.v.) injected as vehicle.

### **Virus amplification and identification**

Viral stock of SARS-CoV-2 was obtained from the Center of Diseases Control, Guangdong Province China. Viruses were amplified on Vero-E6 cells and concentrated by ultrafilter system via 300 kDa module (Millipore). Amplified SARS-CoV-2 were confirmed via RT-PCR, sequencing and transmission electronic microscopy, and titrated via plaque assay ( $10^6$  pfu/ml).

### **Cell culture**

Vero-E6 cells were well cultured in high-glucose DMEM (Gibco, Cat# 11995500BT) supplemented with 10% fetal bovine serum (FBS, Gibco, Cat# 10099-141C) and 1% penicillin-streptomycin (Solarbio, Cat# P1400) in a humidified incubator at 37°C and 5% CO<sub>2</sub>. Trypsin-EDTA (0.05%) phenol red (Gibco, Cat# 25200) was used for cell dissociation.

### **Hematology**

The blood samples were collected from saphenous vein of hind limb of anaesthetized monkeys using 5 ml blood collection tube containing sodium citrate anti-coagulant for further analysis. For serum biochemical analysis, the blood was clotted for 30 min at 4°C and centrifugated at 3,000 × rpm for 15 min to obtain serum. The serum was used to analysis the alanine transaminase (ALT), aspartate transaminase (AST), alkaline phosphatase (ALP), uric acid (UA) and creatinine (CRE-E) by Chemistry Analyzer (Mindray, BS-350E).

### **Serum cytokine and chemokine analysis**

The serum was collected for analysis of cytokine and chemokine. Concentrations of granulocyte colony-stimulating factor (G-CSF), granulocyte-macrophage colony-stimulating factor (GM-CSF), interferon (IFN)- $\gamma$ , interleukin (IL)-1 receptor antagonist, IL-1 $\beta$ , IL-2, IL-4, IL-5, IL-6, IL-8, IL-10, IL-12/23 (p40), IL-13, IL-15, IL-17, IL-18, monocyte chemotactic protein (MCP)-1, macrophage inflammatory protein (MIP)-1 $\alpha$ , MIP-1 $\beta$ , soluble CD40-ligand (sCD40L), transforming growth factor (TGF)- $\alpha$ , tumor necrosis factor (TNF)- $\alpha$ , vascular endothelial growth factor (VEGF) were determined using the Non-Human Primate Cytokine MILLIPLEX map 23-plex kit (Millipore, Cat# PRCYTOMAG-40K) according to the manufacturer's instructions.

### **Quantitative PCR**

RNA extraction and quantitative real-time reverse transcription–polymerase chain reaction (qRT-PCR) were performed on nasal/throat/anal swabs collected from infected monkeys. The virus RNA was extracted from inactivated samples using Trizol LS Reagent (Invitrogen, Cat# 10296010) according to the Direct-zol™ RNA MiniPrep protocol (ZYMO RESEARCH CORP, US). 50  $\mu$ l of DNase/RNase-Free Water was used to elute RNA. Real time RT-PCR was used to quantify viral genome in samples using TaqMan Fast Virus 1-Step Master Mix (ThermoFisher, Cat# 4444434) and purified viral RNA of SARS-CoV-2 as a standard curve, performed on CFX384 Touch

Real-Time PCR Detection System (Bio-Rad, US). Conditions for RT-PCR were used as follows: 25°C for 2 min, 50°C for 15 min, 95°C for 2 min, then 40 cycles at 95°C 5 sec and 58°C 31 sec. Primers and probe, specific for NP gene was synthesized according to sequences reported by Chinese Center for Disease Control and Prevention (CDC).

Target-2-F: GGGGAACTTCTCCTGCTAGAAT,

Target-2-R: CAGACATTTTGCTCTCAAGCTG,

Target-2-P: 5'-FAM-TTGCTGCTGCTTGACAGATT-TAMRA-3'.

In each run, standard dilutions of counted RNA standards were run in parallel, to calculate copy numbers in the samples.

### **Histopathology and immunohistochemistry**

Necropsies of the rhesus macaques were performed according to a standard protocol. After the dissection, the major organs were grossly examined. The lung tissues were harvested, fixed in 10% neutral-buffered formalin solution, embedded in paraffin and 2 µm tissue sections were prepared. For Hematoxylin & Eosin (H&E) staining, slides were stained with Hematoxylin (Leica, Cat# 3801591) and Eosin (Leica, Cat# 3801594) (H&E) prior to microscopic pathologic analysis. Histopathological analysis of tissue slides was performed by pathologists blinded to the group assignment of the animals. To perform immunohistochemistry staining of macrophage, the anti-CD68 primary antibody (Abcam, Cat# ab213098) and anti-CD163 primary antibody (Servicebio, Cat# GB13340) was used. The corresponding second antibodies used were HRP conjugated Goat Anti-Mouse IgG (H+L) (Servicebio, Cat# GB23301) and HRP conjugated Goat Anti-Rabbit IgG (H+L) (Servicebio, Cat# G1215). The whole slide images were collected using Panoramic DESK (3D HISTECH) and analyzed with Caseviewer C.V 2.3 and Image Pro plus 6.0.

### **Statistical analysis**

For statistical analysis,  $P$  values were calculated by one-way ANOVA using GraphPad Prism 8 with default parameters. Error bars represent SEM and  $P < 0.05$  was considered statistically significant (\*\* $P < 0.01$ , \*\*\*\* $P < 0.0001$ ).
